# Supplementary material for: Efficient, flexible and mechanically robust perovskite solar cells on inverted nanocone plastic substrates
Source: Royal Society of Chemistry journal article supplement (doi:10.1039/c5nr08836d), 2016-01-01
Supplement: c5nr08836d1.pdf [file c5nr08836d1.pdf]

## **Efficient, Flexible and Mechanically Robust Perovskite Solar Cells on Inverted Nanocone Plastic Substrates**

Mohammad Mahdi Tavakoli,<sup>a</sup> Qingfeng Lin,<sup>a</sup> Siu-Fung Leung<sup>a</sup>, Ga Ching Lui<sup>a</sup>, Hao Lu,<sup>b</sup> Liang Li,<sup>b</sup> Bin Xiang<sup>c</sup> and Zhiyong Fan<sup>a\*</sup>

<sup>a</sup>*Department of Electronic and Computer Engineering, The Hong Kong University of Science and Technology, Clear Water Bay, Kowloon, Hong Kong SAR, China.*

<sup>b</sup>*College of Physics, Optoelectronics and Energy, Jiangsu Key Laboratory of Thin Films, Soochow University, Suzhou, 215006, P. R. China.*

<sup>c</sup>*Department of Materials Science & Engineering, CAS Key Lab of Materials for Energy Conversion, University of Science and Technology of China, Hefei, Anhui 230026, China.*

\*Corresponding author, email: eezfan@ust.hk (Z. Fan)

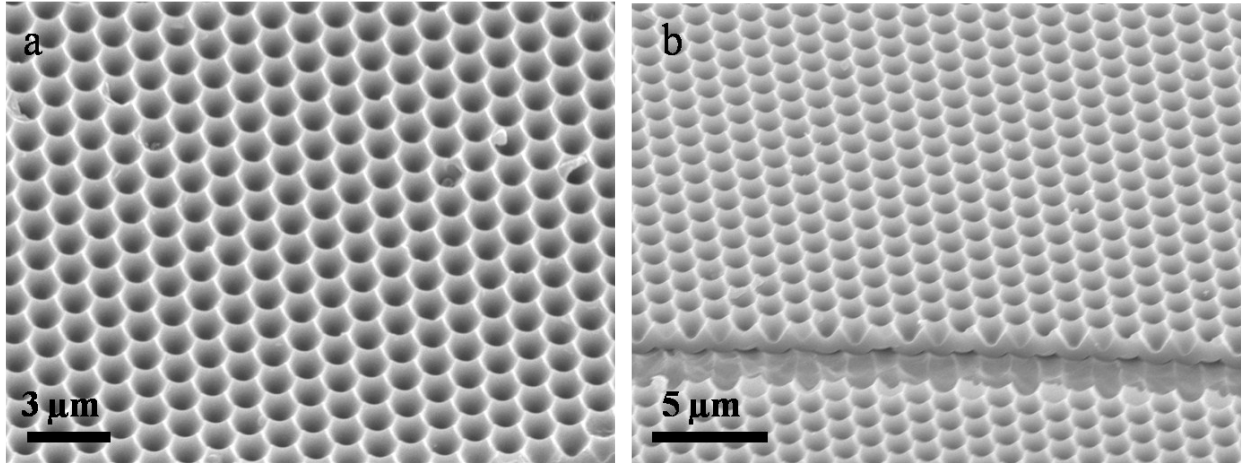

**Figure S1.** (a)Top and (b) Angular view SEM images of gold-coated nanocone AAO template with 1.2 μm pitch and 1.2 μm depth.

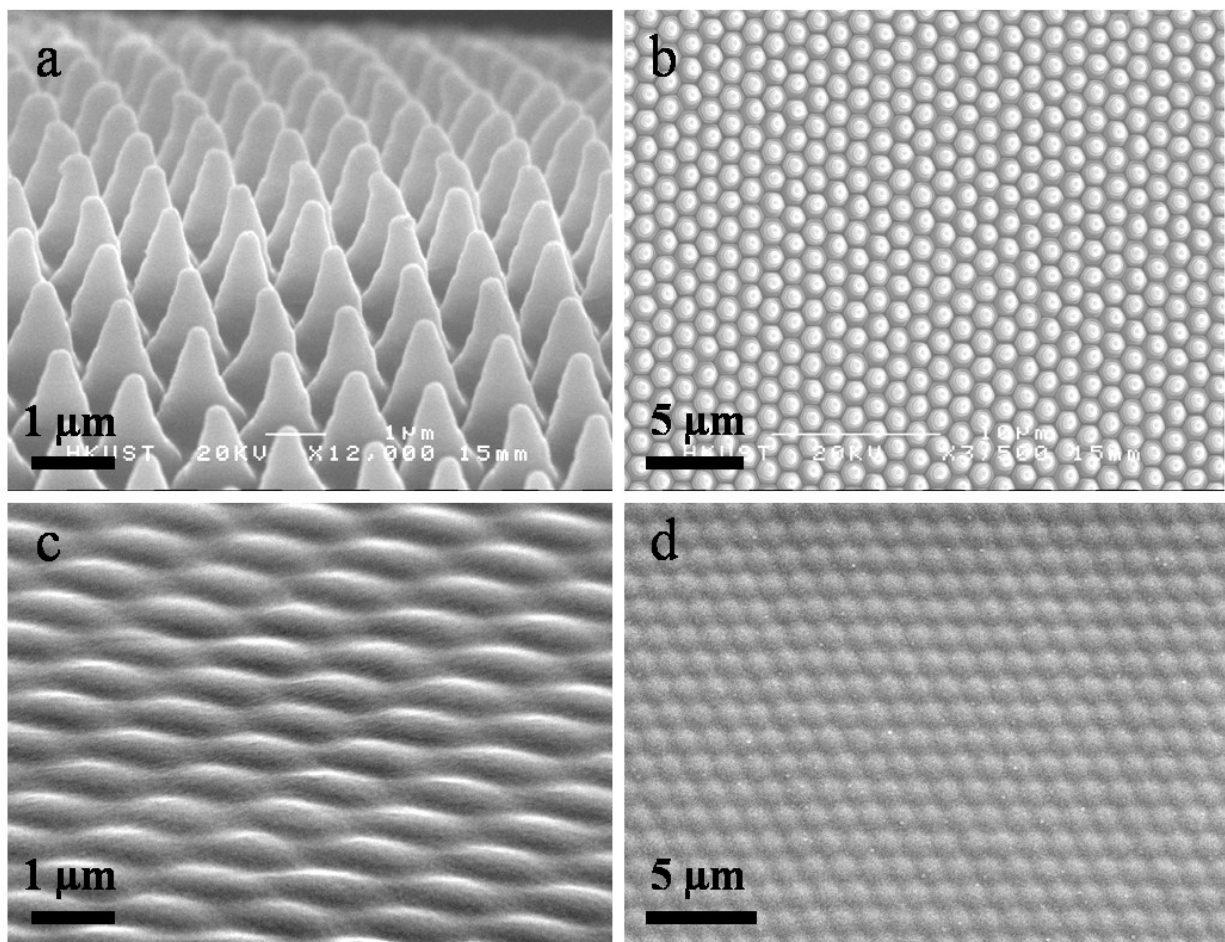

**Figure S2.** (a,c) Angular and (b,d) Top view of nanocone PDMS template with aspect ratio of 1.0 (a,b) and 0.25 (c,d).

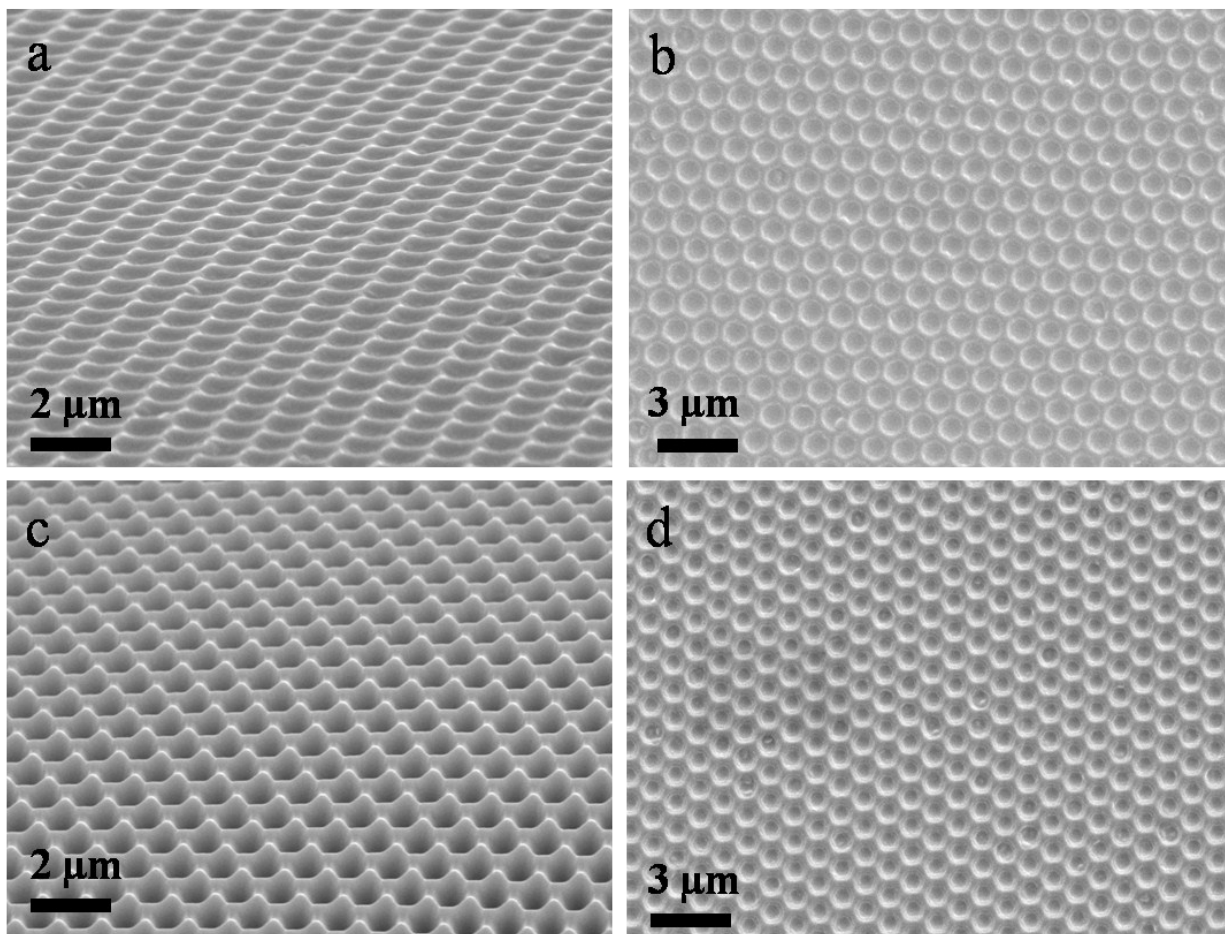

**Figure S3.** (a,c) Angular and (b,d) Top view of inverted nanocone epoxysubstrate with aspect ratio of 0.25 (a,b) and 1 (c,d).

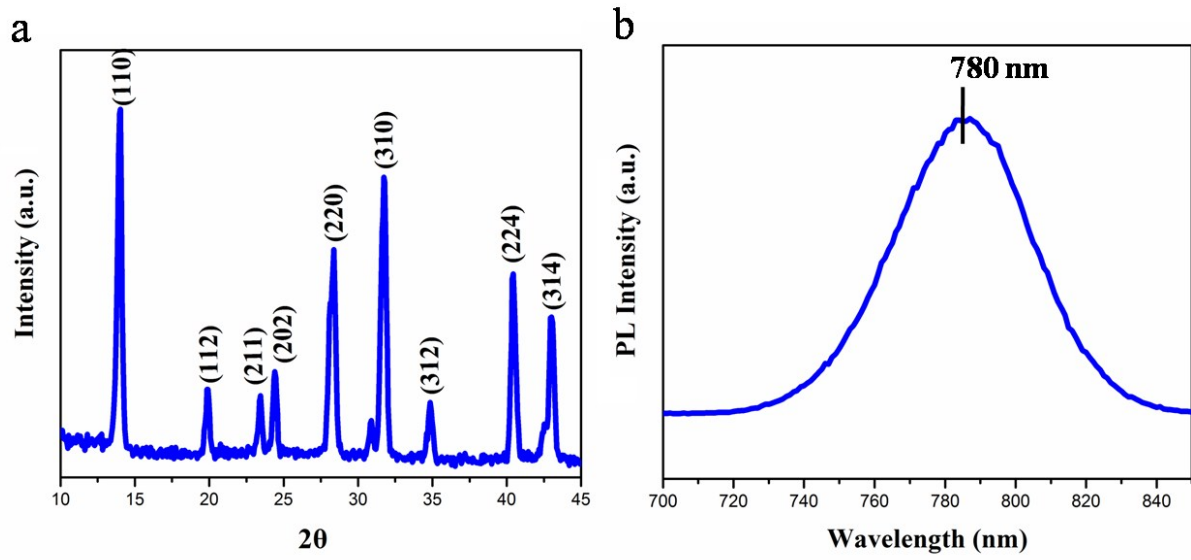

**Figure S4.** (a) XRD pattern and (b) photoluminescence spectrum of perovskite thin film.

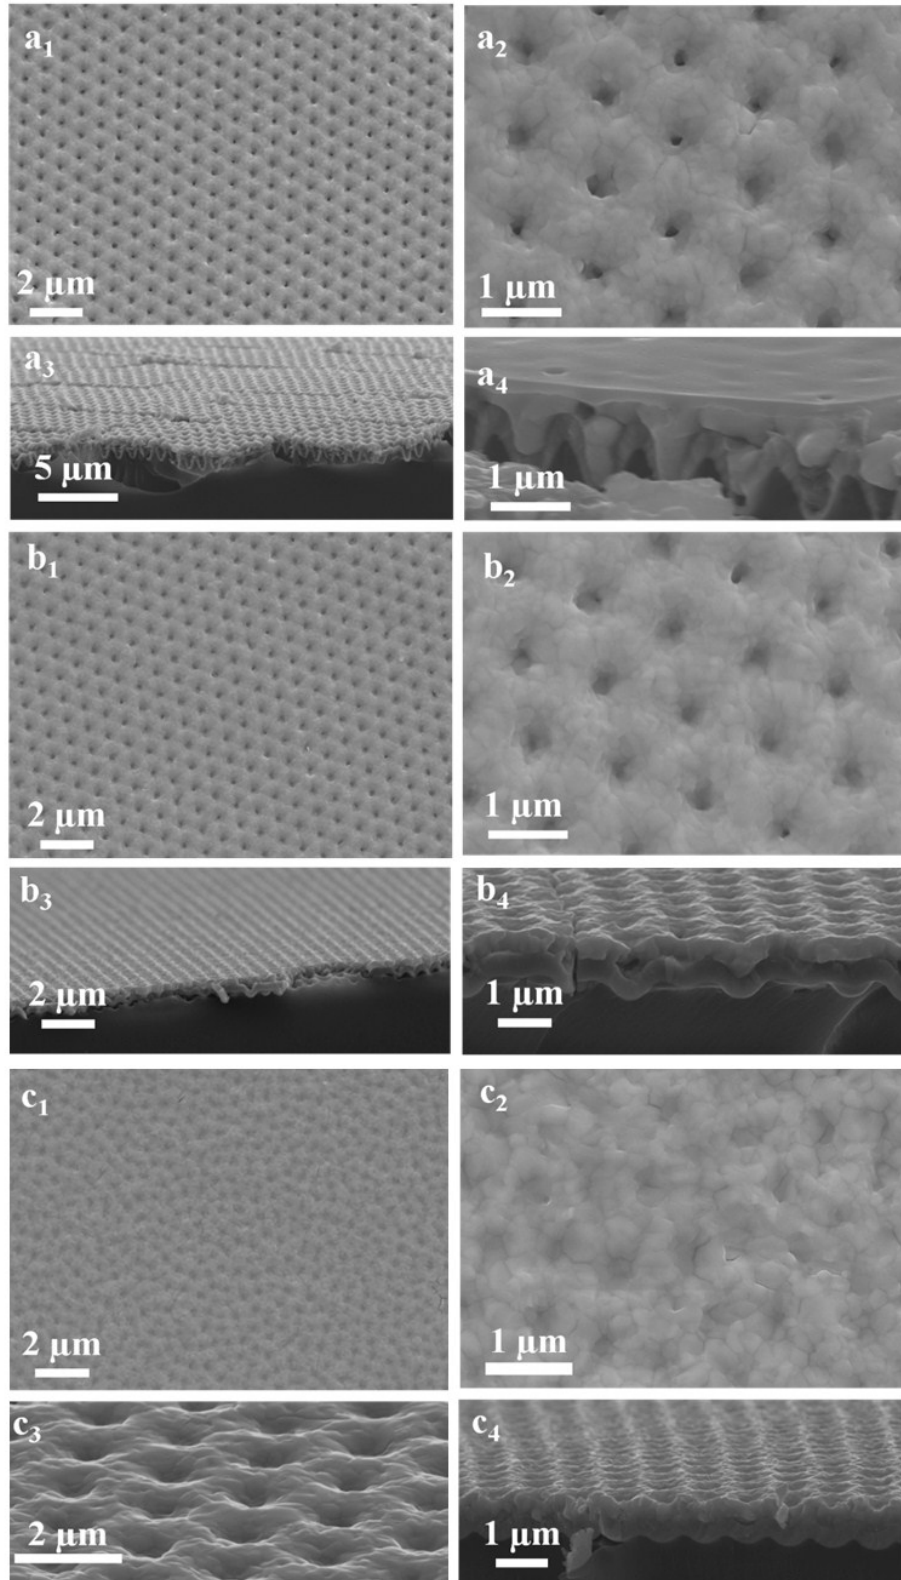

**Figure S5.** The top and cross sectional view SEM images of perovskite layer based on i-cone substrates with different aspect ratios,(a<sub>1</sub>-a<sub>4</sub>) 1, (b<sub>1</sub>-b<sub>4</sub>) 0.5, (c<sub>1</sub>-c<sub>4</sub>) 0.25.

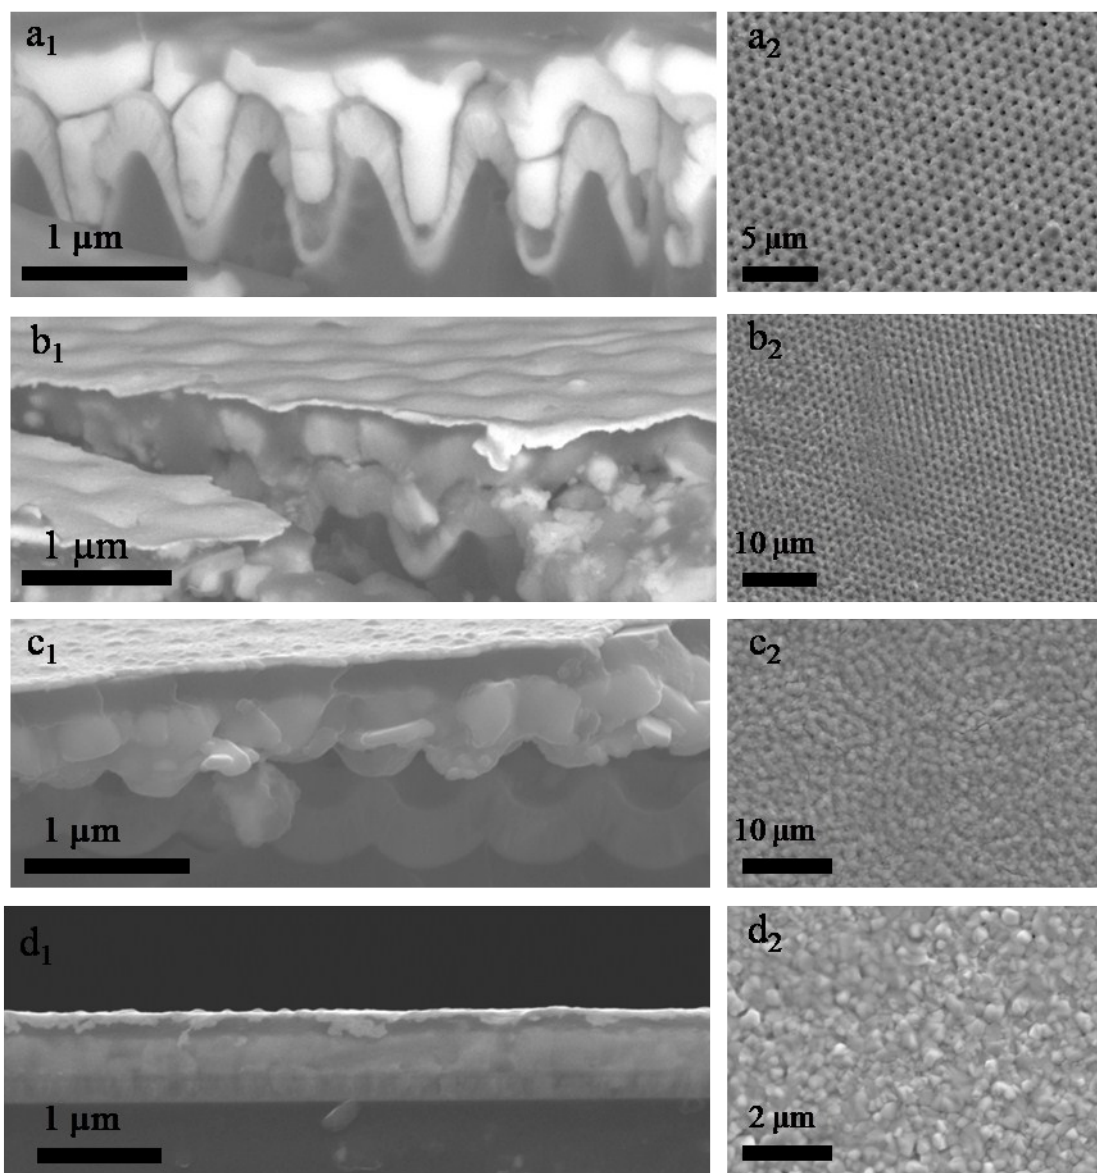

**Figure S6.** The cross section and top view SEM images of perovskite solar cell based on i-cone substrates with different aspect ratios, ( $a_1, a_2$ ) 1, ( $b_1, b_2$ ) 0.5, ( $c_1, c_2$ ) 0.25, and ( $d_1, d_2$ ) flat substrate.

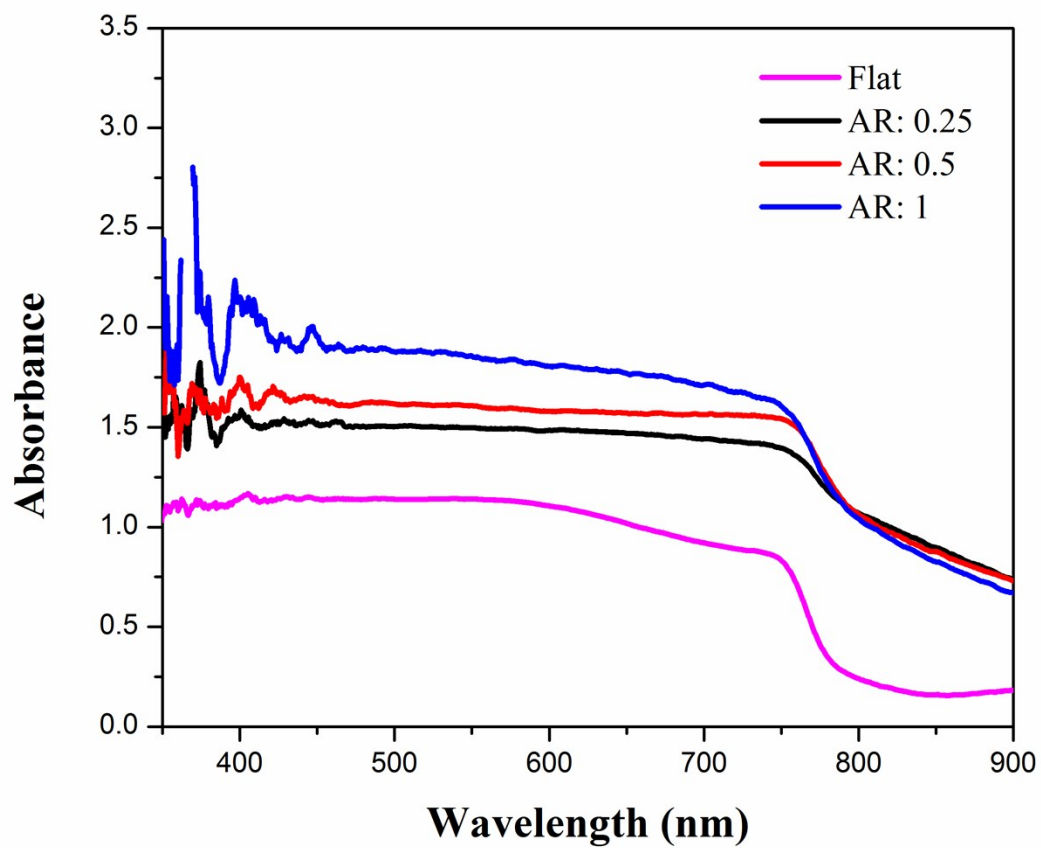

**Figure S7:** The absorbance spectra of perovskite films deposited on i-cone substrates with different aspect ratios.



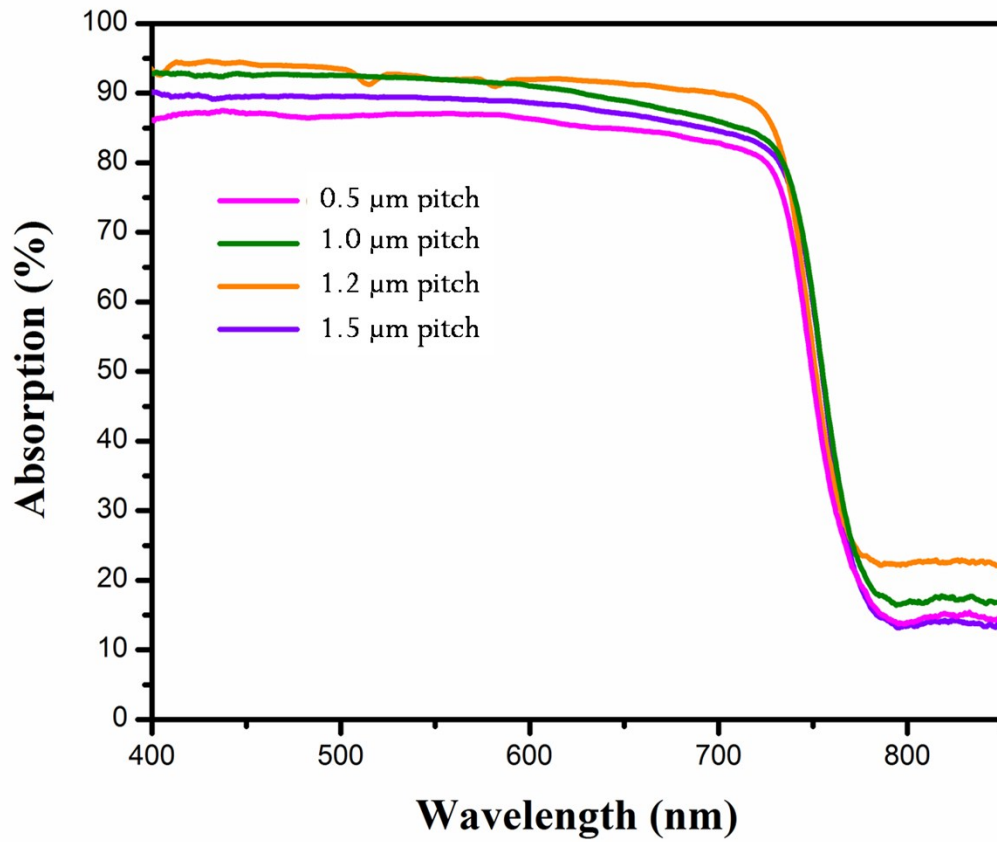

**Figure S8:** The light harvesting efficiency of perovskite thin film on the i-cone substrates with different pitch sizes of 0.5, 1.0, 1.2, and 1.5  $\mu\text{m}$ .

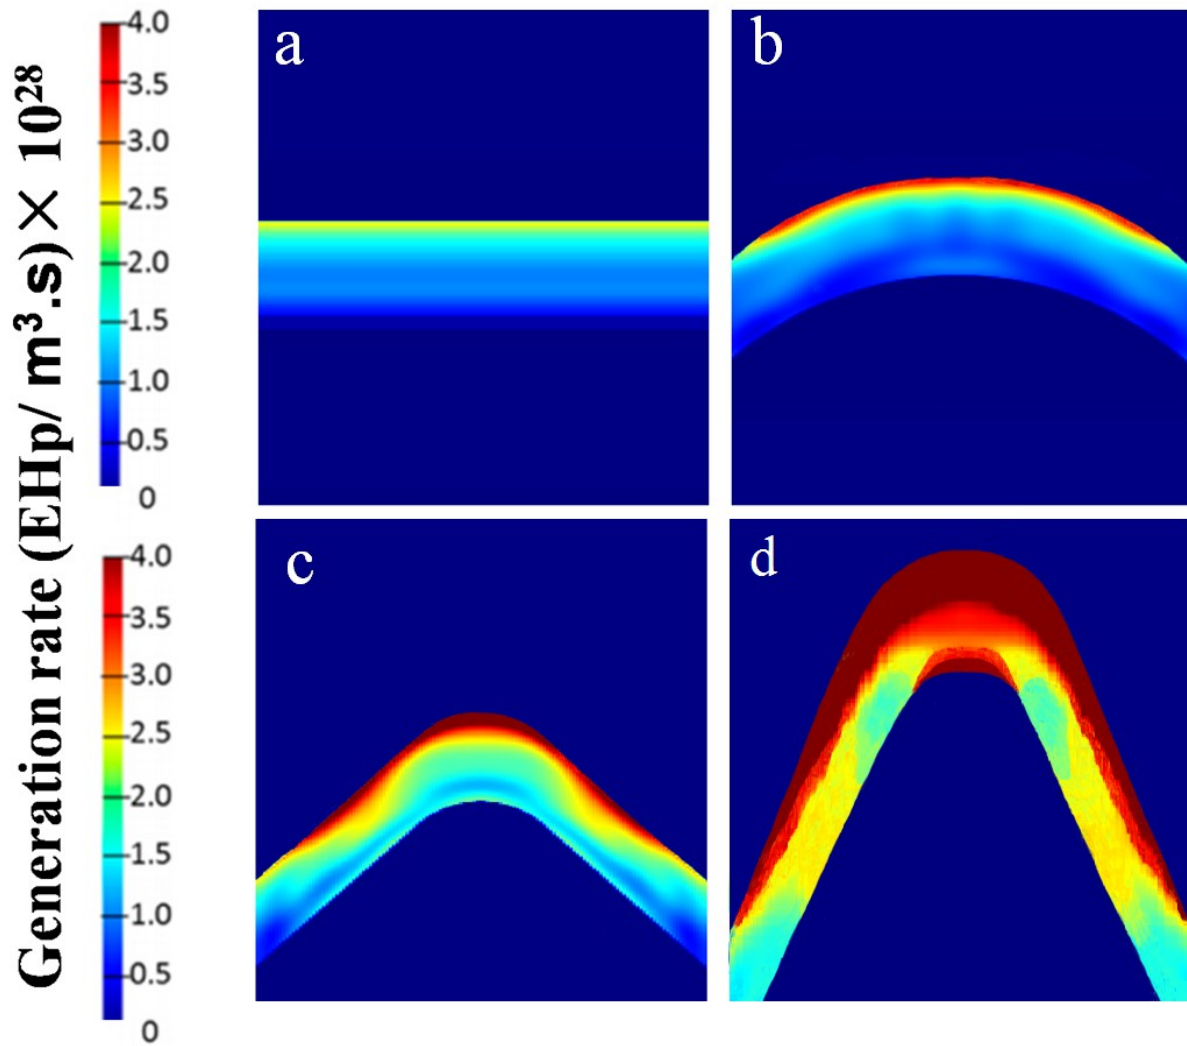

**Figure S9.** FDTD simulation: The fringe patterns of generation rate (number of absorbed photons/m<sup>3</sup>.s) in perovskite layer, flat device (a), and i-cone plastic substrates with different aspect ratios, (b) 0.25,(c) 0.5,(d) 1.0. The thickness of the absorber layer was fixed 300 nm for all devices.

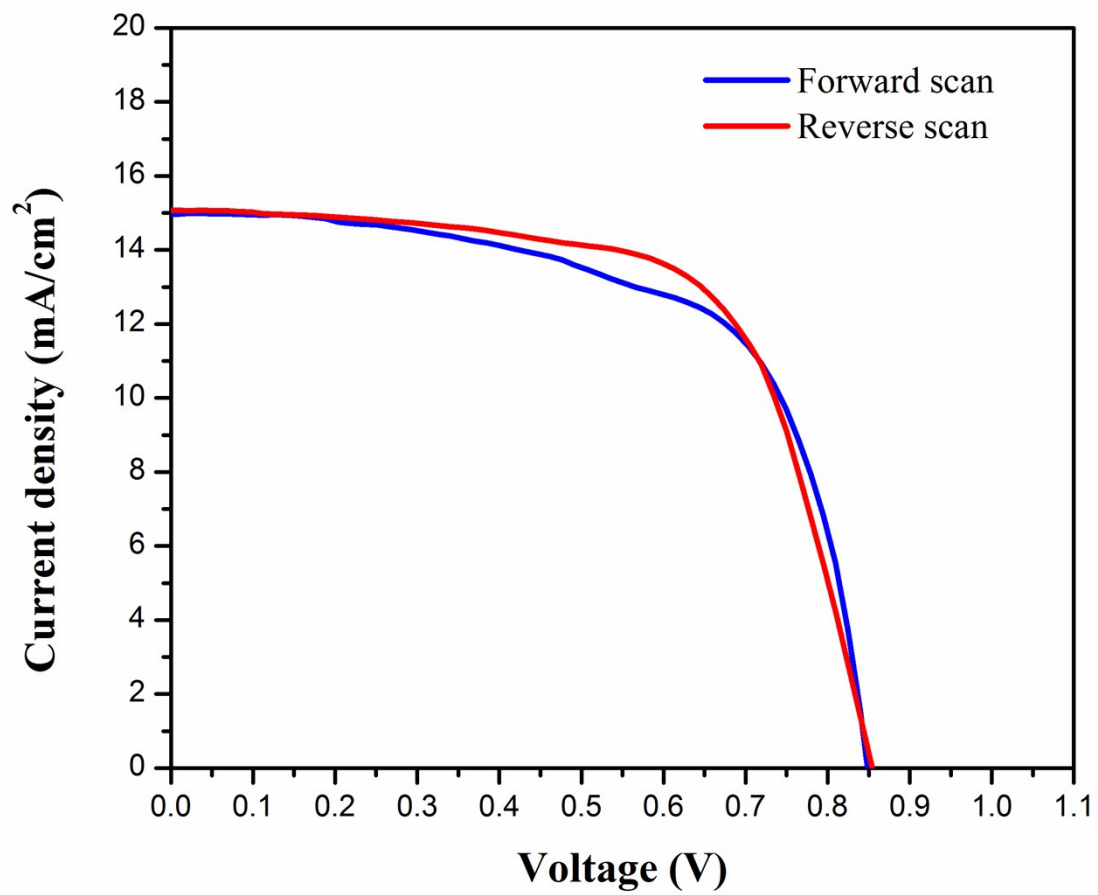

**Figure S10.** J-V measurement of perovskite solar cell with different scan direction (forward and reverse scan).

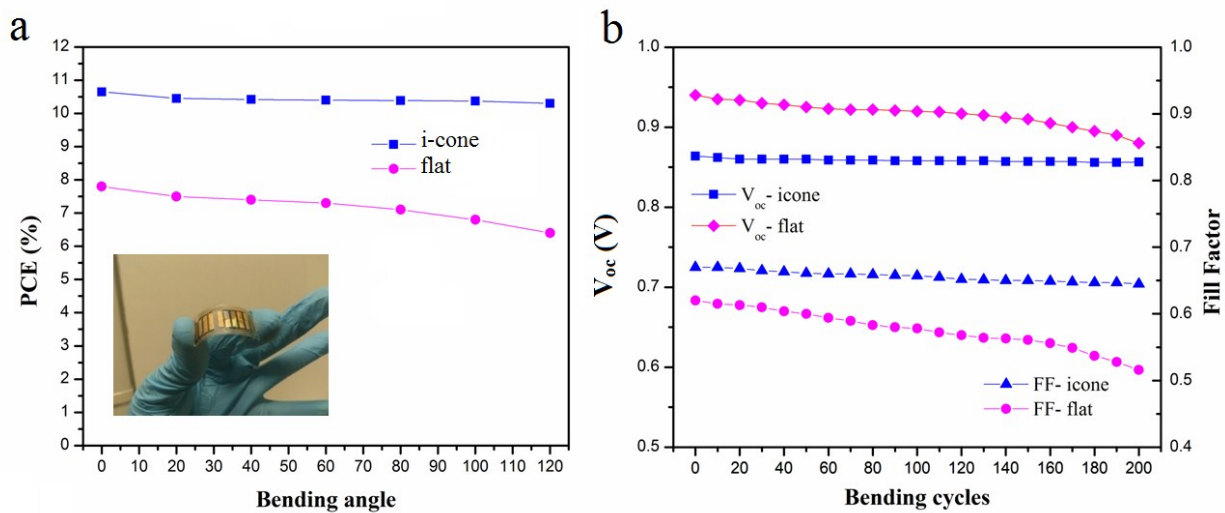

**Figure S11.** (a)Efficiency stability depending on bending angle in perovskite solar cells based on flat and 0.5-aspect ratio-i-cone-epoxy substrates. (b)The stability of  $V_{oc}$  and Fill factor depending on bending cycles in perovskite solar cells based on i-cone epoxy substrate.

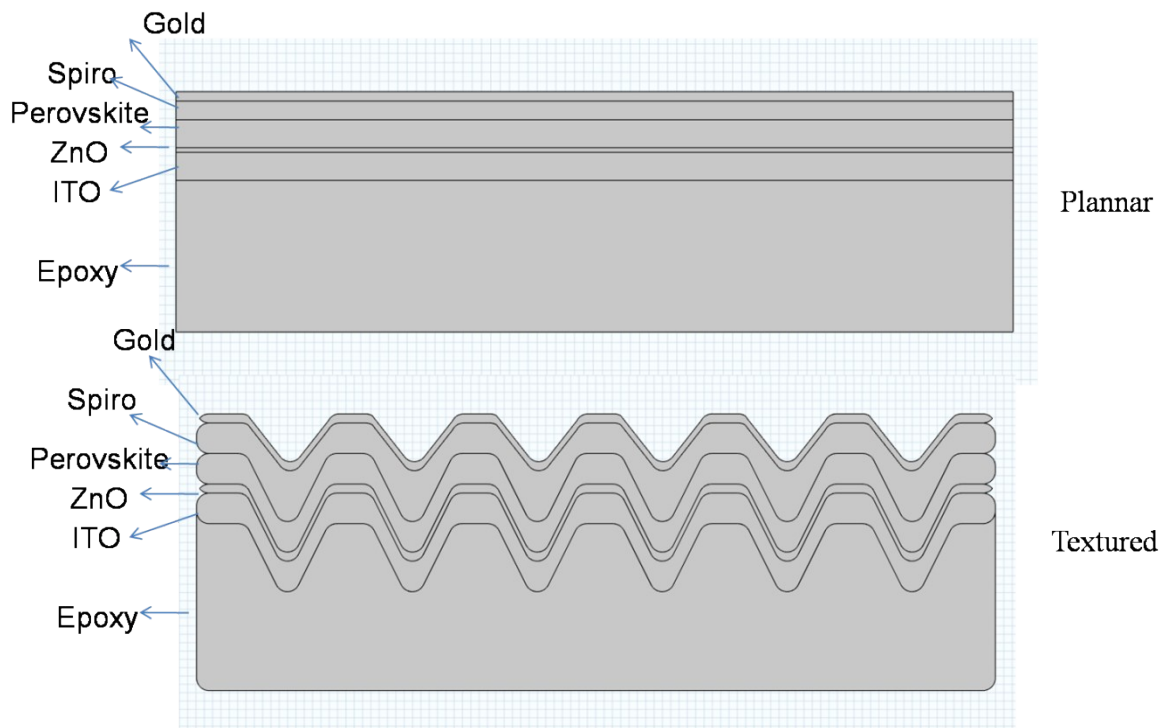

**Figure S12.** The modeling of flat and i-cone perovskite solar cell for mechanical simulation. The size of the model is  $10 \times 3 \mu\text{m}^2$ .
